# Supplementary material
Source: PubMed Central journal article supplement (PMC4967013)

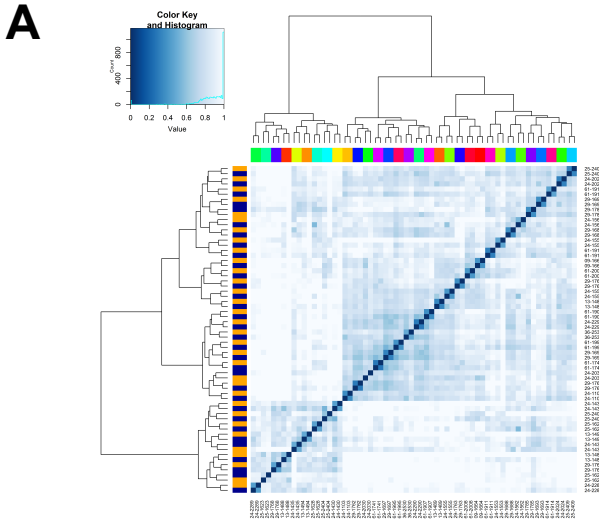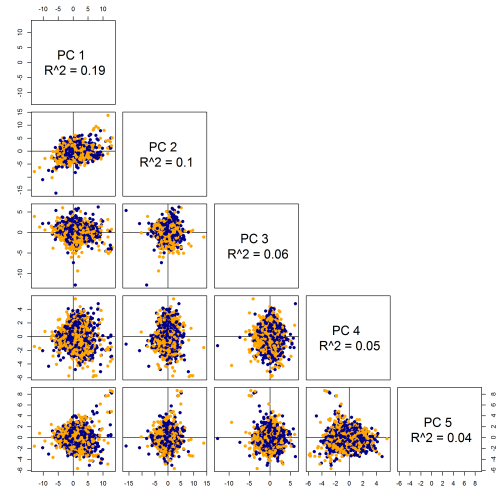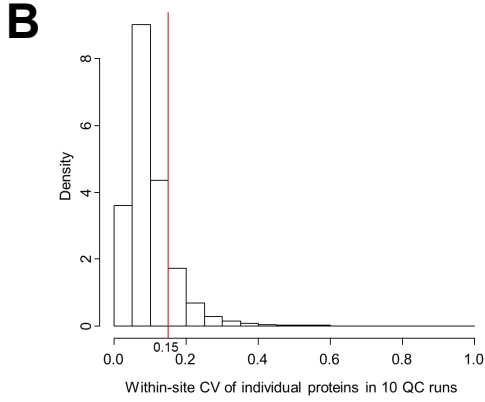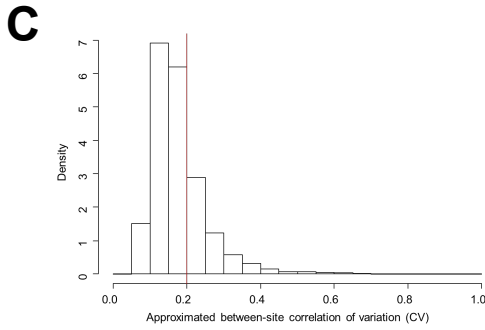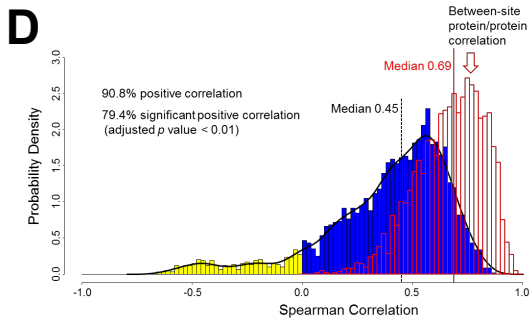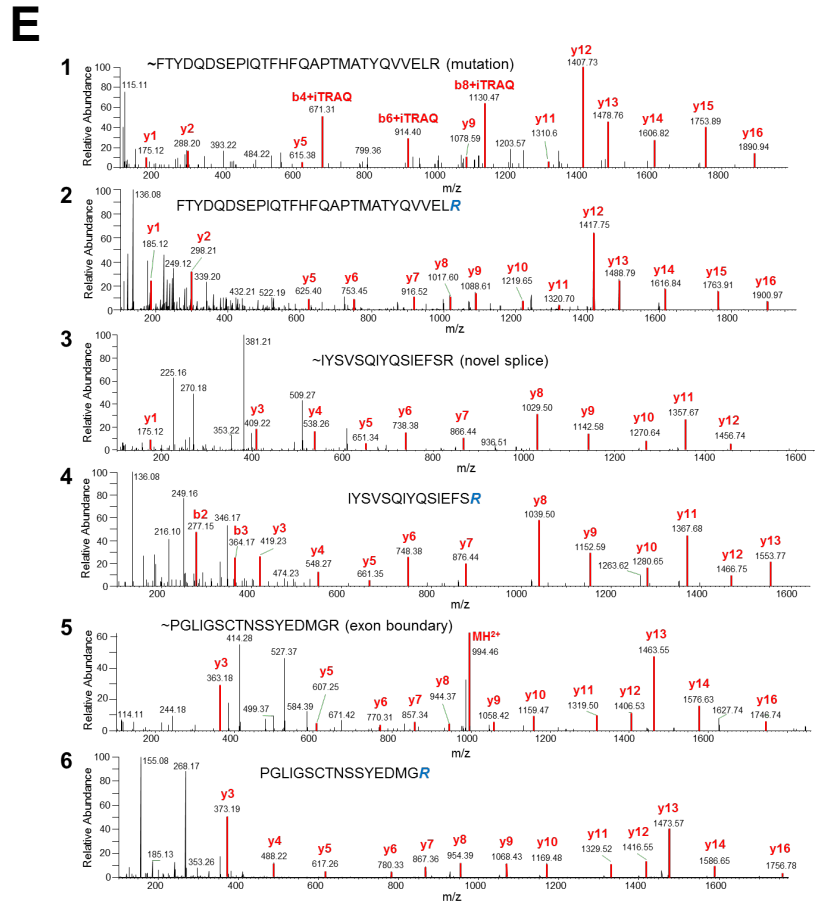

Supplement: NIHMS789640-supplement-3.pdf [file NIHMS789640-supplement-3.pdf]

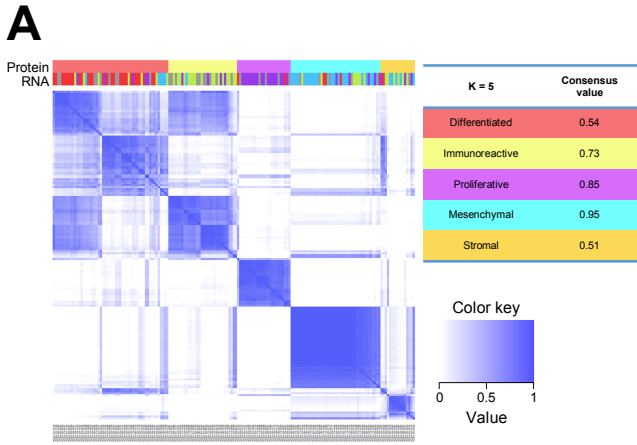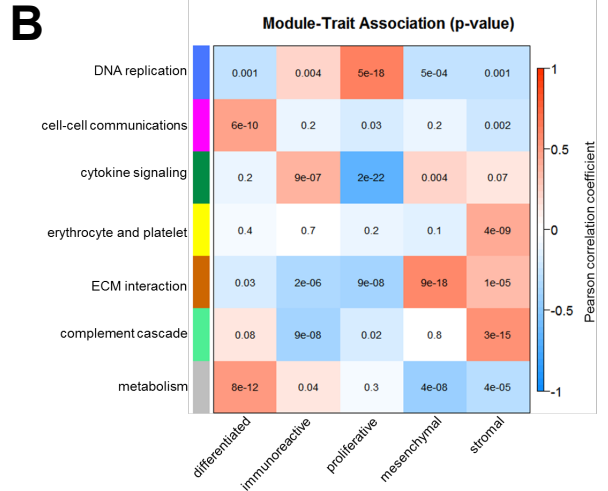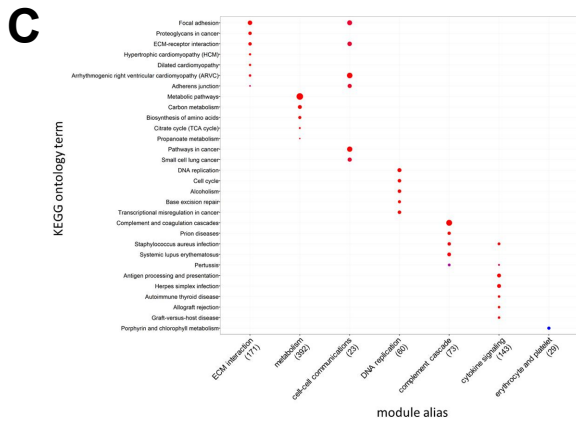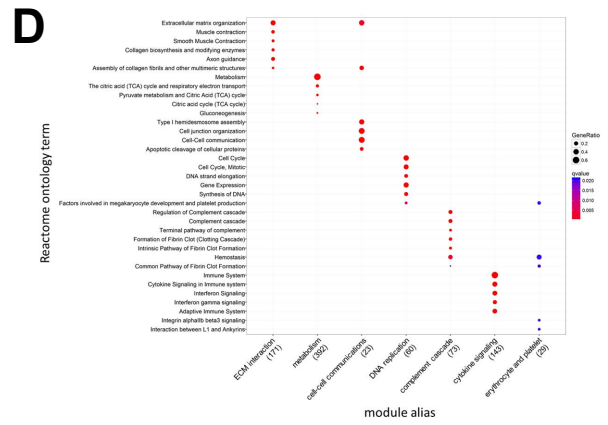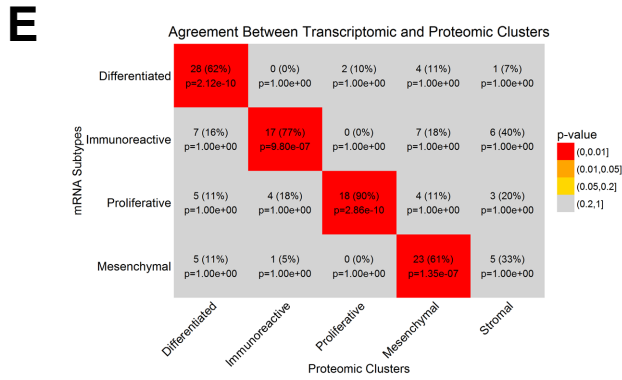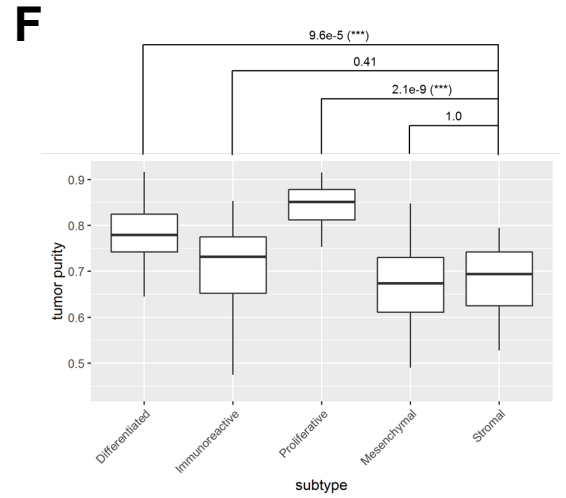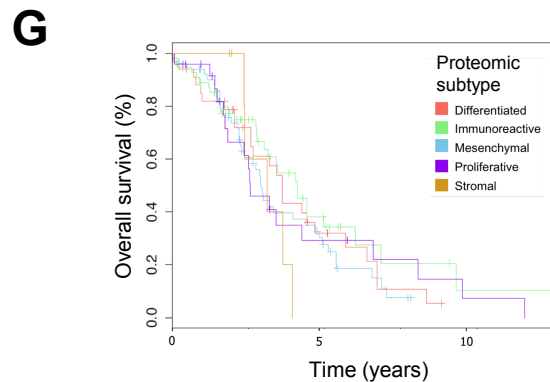

Supplement: NIHMS789640-supplement-4.pdf [file NIHMS789640-supplement-4.pdf]

**A**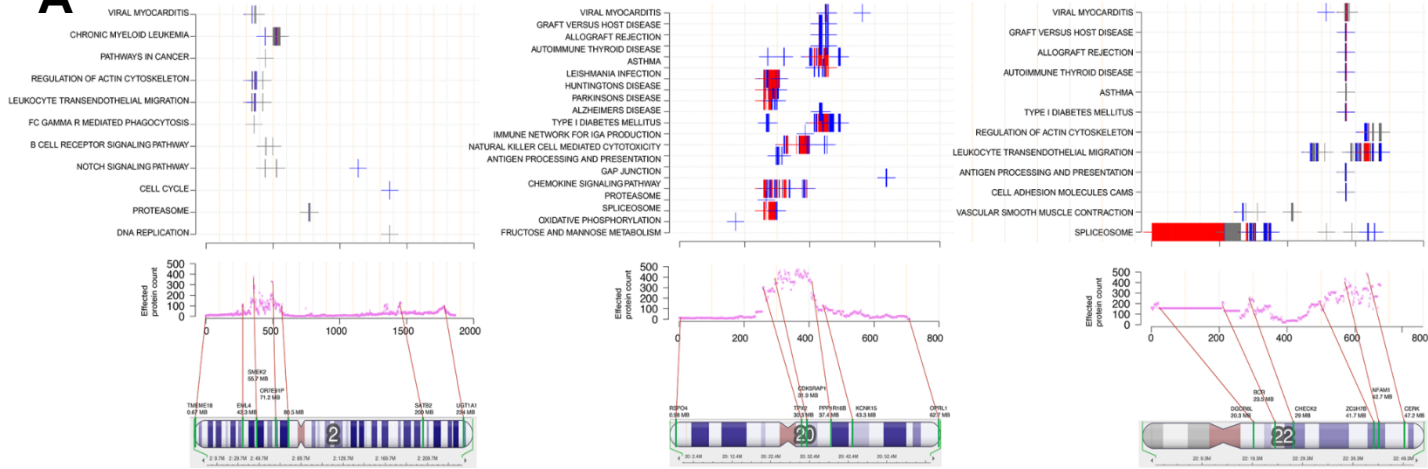**B**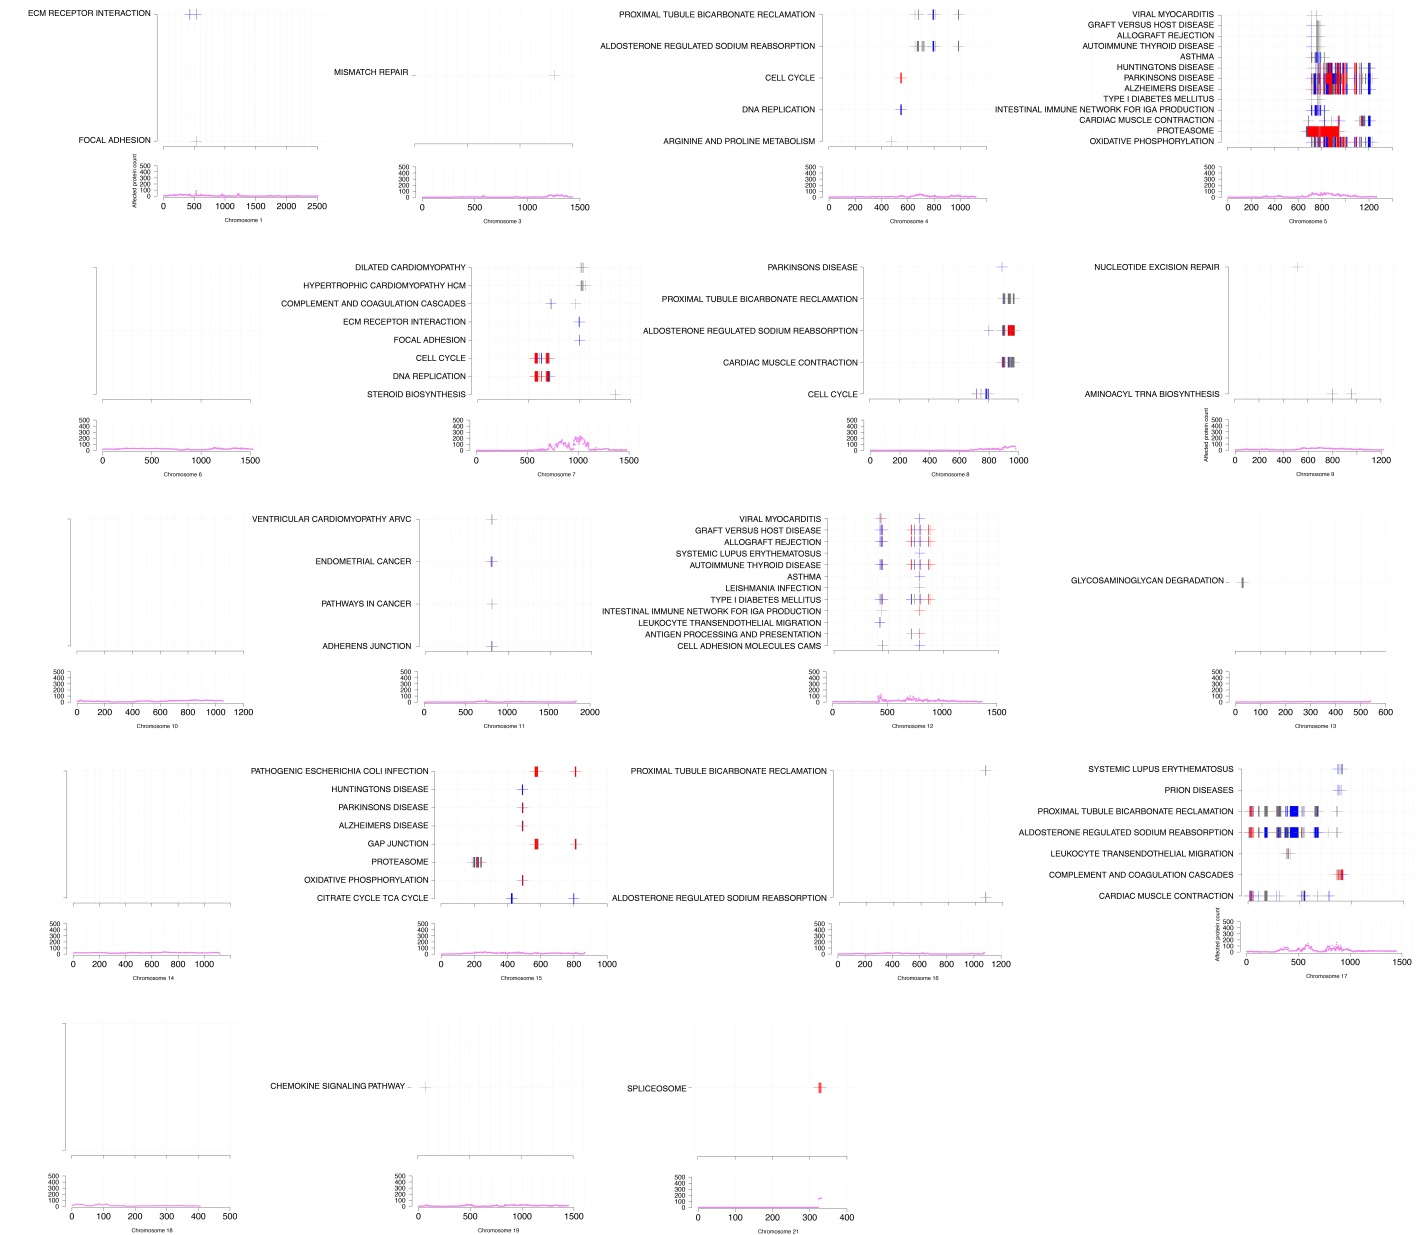

Supplement: NIHMS789640-supplement-5.pdf [file NIHMS789640-supplement-5.pdf]

**A**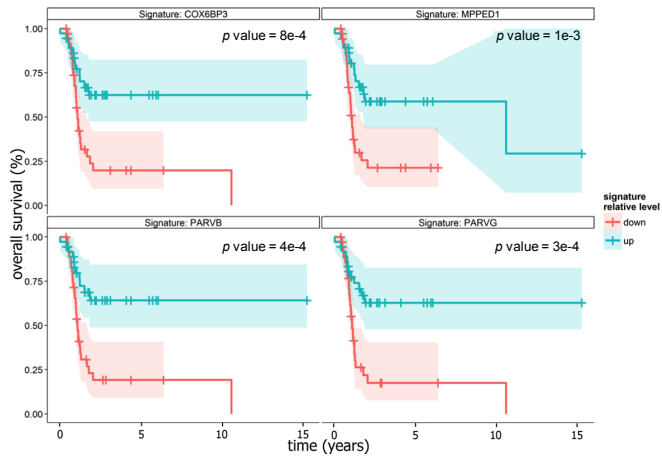**B**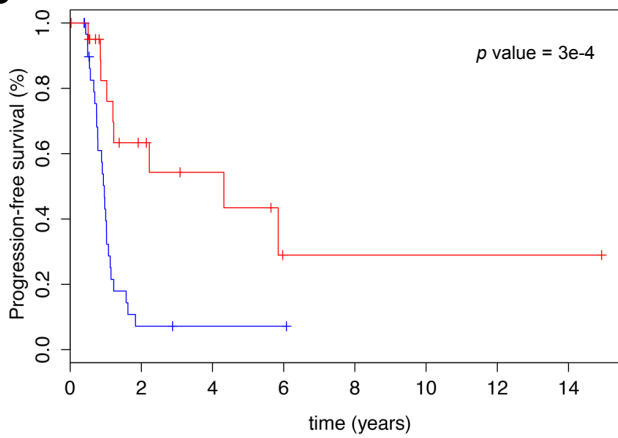**C**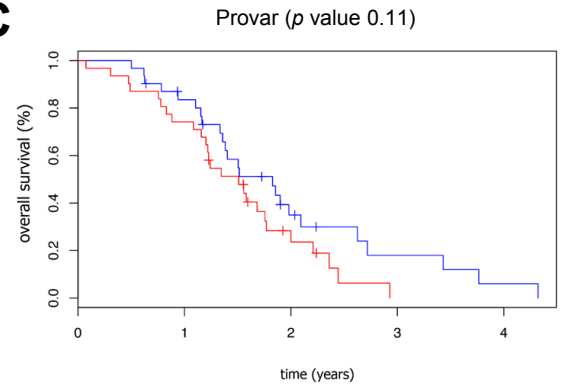Provar + consensus signature ( $p$  value  $1.3e-5$ )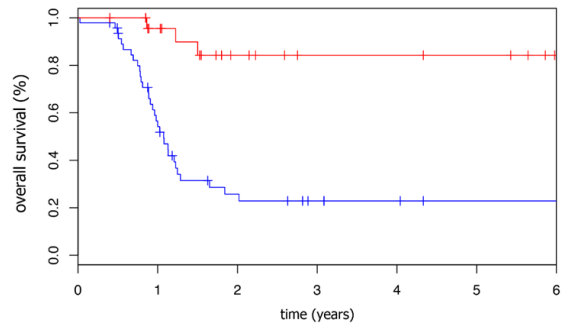

Supplement: NIHMS789640-supplement-6.pdf [file NIHMS789640-supplement-6.pdf]

**A**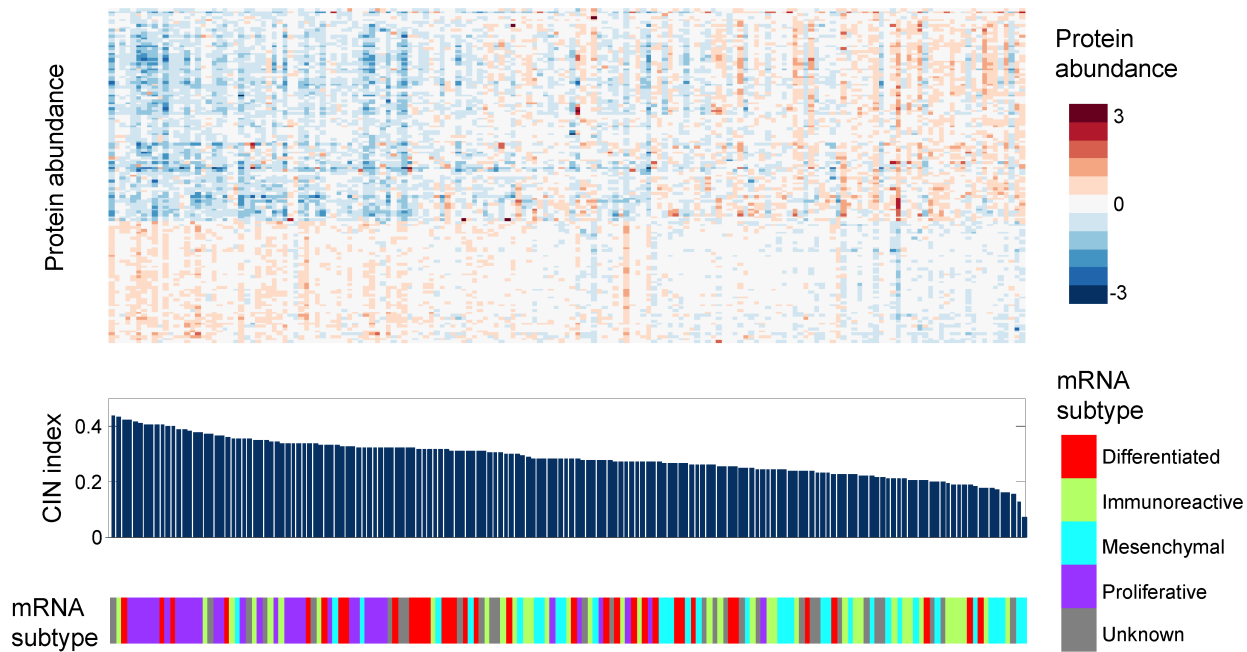**B**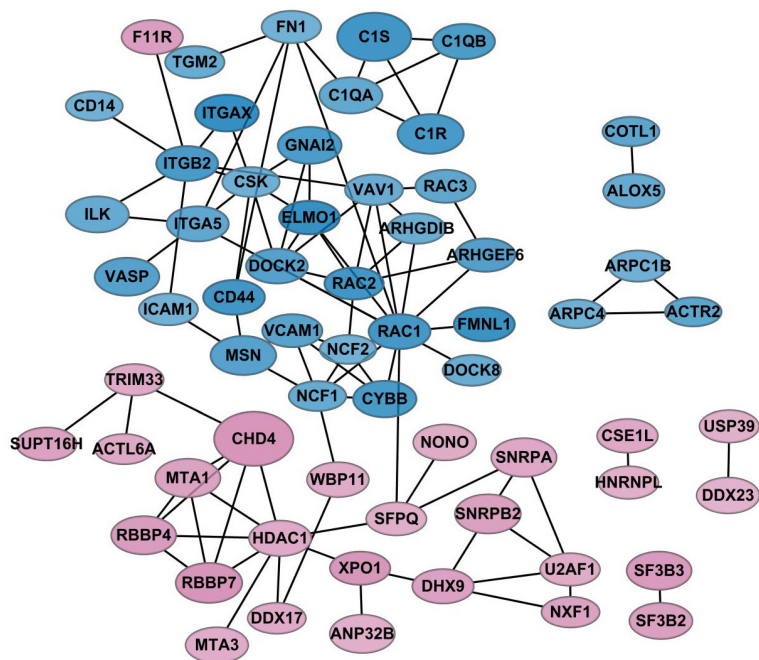

Supplement: NIHMS789640-supplement-7.pdf [file NIHMS789640-supplement-7.pdf]
